# Supplementary material for: The Q41R mutation in the HCV-protease enhances the reactivity towards MAVS by suppressing non-reactive pathways
Source: Royal Society of Chemistry journal article supplement (doi:10.1039/d1cp05002h), 2021-12-14
Supplement: d1cp05002h1.pdf [file d1cp05002h1.pdf]

## Electronic supplementary information (ESI)

### The Q41R mutation in HCV-protease enhances the reactivity towards MAVS by suppressing non-reactive pathways

Chen Zheng<sup>1,2\*</sup>, Markus Schneider<sup>1,2</sup>, Antoine Marion<sup>1,3\*</sup>, and Iris Antes<sup>1,2§</sup>

<sup>1</sup>Technische Universität München (TUM), TUM School of Life Sciences, 85354 Freising, Germany

<sup>2</sup>Technische Universität München (TUM), TUM Center for Functional Protein Assemblies, 85747 Garching, Germany

<sup>3</sup>Middle East Technical University, Department of Chemistry, 06800 Ankara, Turkey

\*corresponding authors

§initial corresponding author; passed away Aug. 4, 2021

## Supplementary Figures

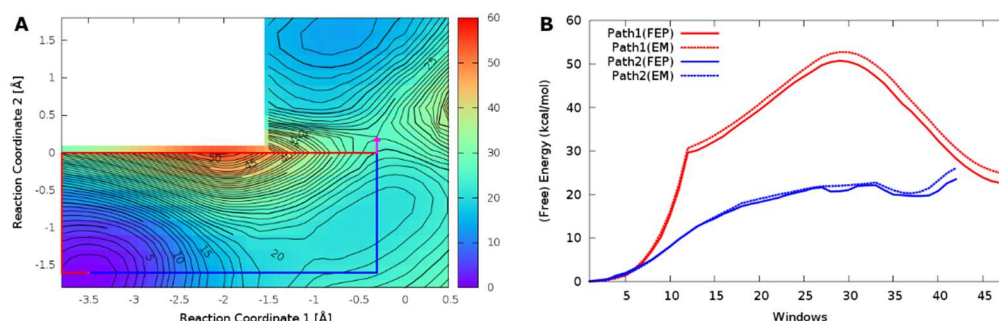

Figure S1. (A) Two paths connecting the reactant state and the second transition state on the potential energy surface of the acylation reaction for the wild type HCV NS3/4A protease bound to MAVS with non-reactive conformation calculated at the B3LYP/def2-TZVP level. (B) Free energy differences (solid lines) calculated by QM/MM FEP and energy differences (dashed lines) calculated by single point QM/MM calculations along two different paths. The scan path is shown in red and another path is shown in blue.

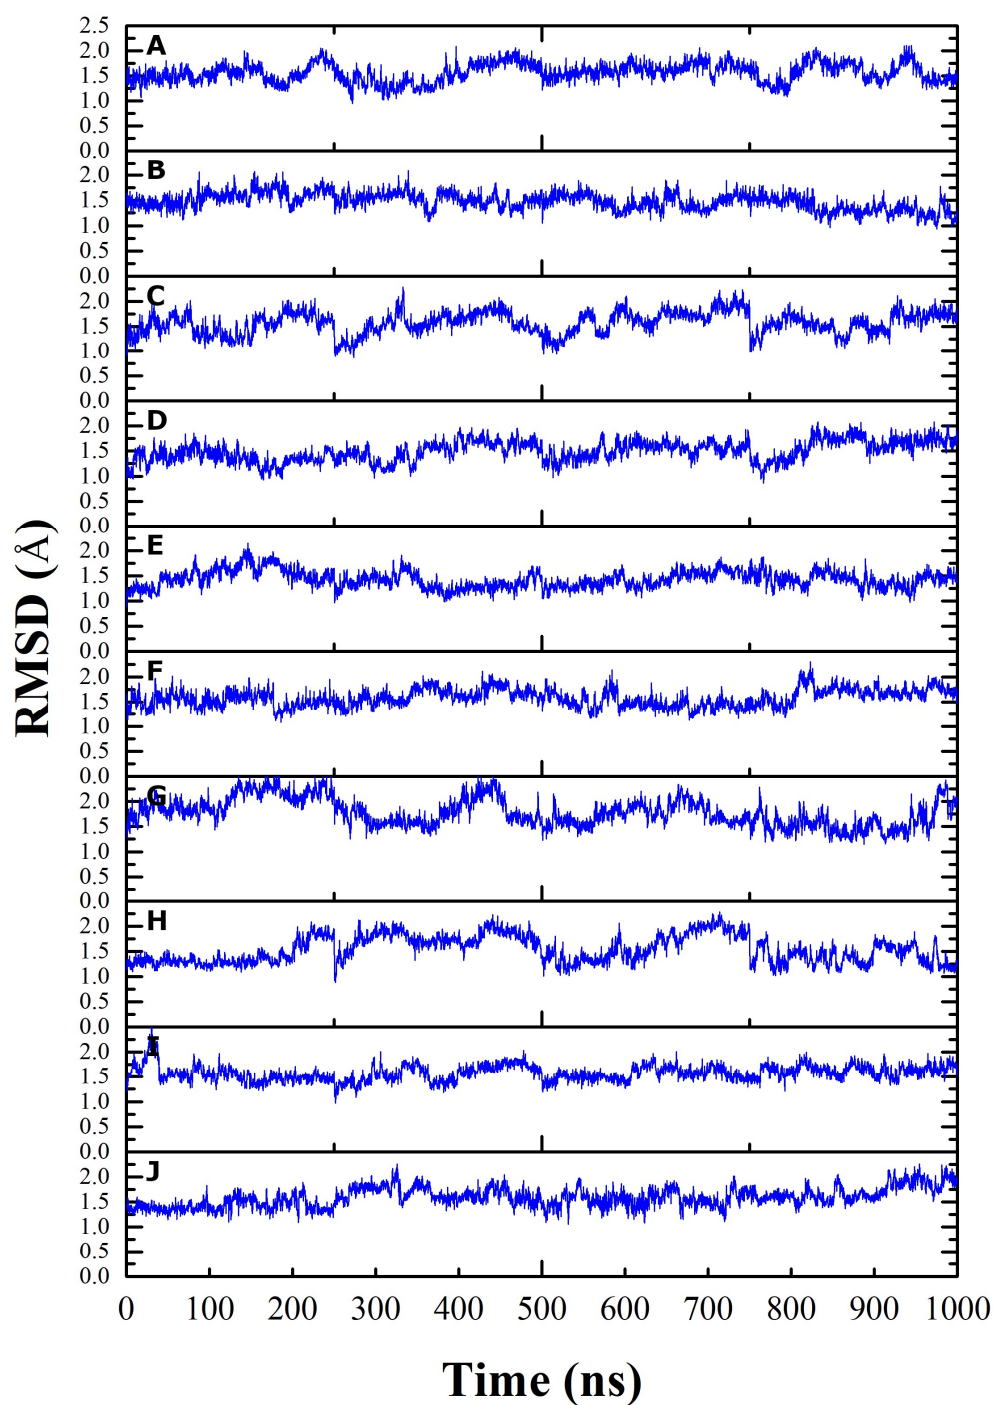

Figure S2. RMSD plots of the backbone of the protein-substrate complex with respect to its initial structure of production simulation for (A) WT-MAVS, (B) D168A-MAVS, (C) R155K-MAVS, (D) Q41R-MAVS, (E) Q41R-D168A-MAVS, (F) WT-NS4AB, (G) D168A-NS4AB, (H) R155K-NS4AB, (I) Q41R-NS4AB, and (J) Q41R-D168A-NS4AB.

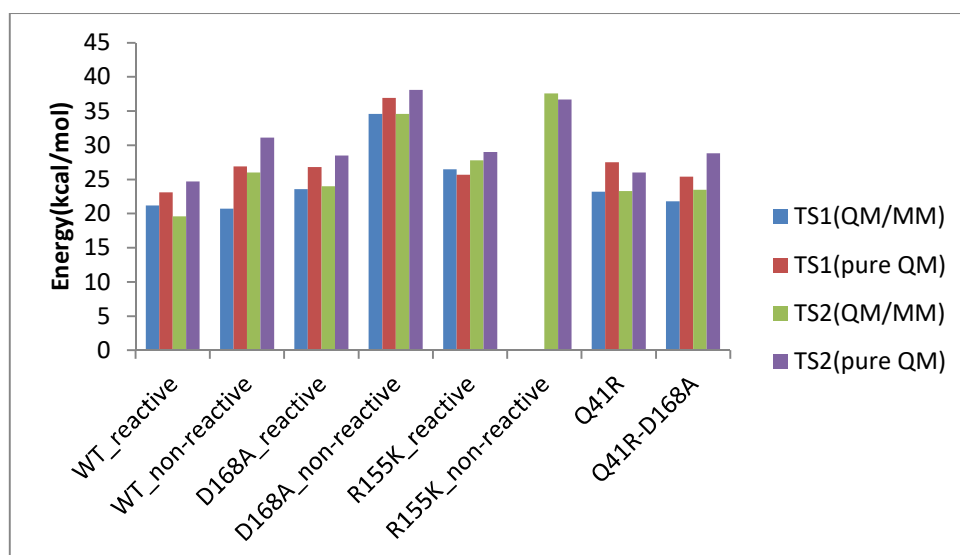

Figure S3. Relative QM/MM single point energies and pure QM energies (without MM part) of both transition states for HCV NS3/4A protease variants bound to MAVS.
